# Supplementary material for: Aqueous carbofuran removal using slow pyrolyzed sugarcane bagasse biochar: equilibrium and fixed-bed studies
Source: Royal Society of Chemistry journal article supplement (doi:10.1039/c9ra01628g), 2019-01-01
Supplement: c9ra01628g1.pdf [file c9ra01628g1.pdf]

## **Supporting material**

### **Aqueous Carbofuran Removal Using Slow Pyrolysis Sugarcane Bagasse Biochar-Equilibrium and Fixed- bed Studies**

**Vineet Vimal, Manvendra Patel and Dinesh Mohan\***

**School of Environmental Sciences  
Jawaharlal Nehru University  
New Delhi 110067, India  
Email: dm\_1967@hotmail.com  
Phone: 0091-11-26704616  
FAX: 0091-11-26704616**

## 1. Kinetic models:

Pseudo-first order<sup>1</sup> (eqn. SM1) and Pseudo-second order<sup>2</sup> (eqn. SM2) kinetic equations applied on the sorption data to assess the effect of both initial concentration and adsorbent dose. The equations were present below:

$$q_t = q_e \left(1 - e^{-k_1 t}\right) \quad (\text{SM1})$$

Where  $k_1$  ( $\text{min}^{-1}$ ) is the first order adsorption rate constant,  $q_e$  and  $q_t$  are the amounts of carbofuran adsorbed at equilibrium and at time “t”, respectively.

$$\frac{t}{q_t} = \frac{1}{k_2 q_e^2} + \frac{t}{q_e}$$

(SM2)

Where,  $k_2$  is rate constant of pseudo second order adsorption ( $\text{g mg}^{-1} \text{min}^{-1}$ ).  $k_2$  and  $q_e$  values were determined from the plots at different temperatures and concentrations.  $k_2$  ( $\text{g mg}^{-1} \text{min}^{-1}$ ) can be determined experimentally from the slope and intercept of plot  $t/q_t$  versus t.

## 2. Isotherm models:

Sorption data was fitted using Freundlich,<sup>3</sup> Langmuir,<sup>4</sup> and Temkin<sup>5</sup> isotherm models. The non-linear form of Freundlich model is shown in eqn. SM3

$$q_e = K_F C_e^{1/n} \quad (\text{SM3})$$

Where  $q_e$  is the amount of carbofuran adsorbed per unit biochar weight ( $\text{mg/g}$ ),  $C_e$  is the equilibrium carbofuran concentration ( $\text{mg/L}$ ), constant  $K_F$  indicates the biochar’s relative adsorption capacity ( $\text{mg/g}$ ) and  $1/n$  is the adsorption intensity.

The linear form of Langmuir isotherm however is given in eqn. SM4.

$$q_e = \frac{Q^0 b C_e}{1 + b C_e}$$

(SM4)

Where  $q_e$  is the amount of carbofuran adsorbed per unit weight of adsorbent (mg/g),  $C_e$  is the carbofuran equilibrium concentration in solution in mg/L,  $Q^0$  is the monolayer adsorption capacity (mg/g) and  $b$  is constant related to the net enthalpy. Non-linear form of Temkin<sup>5</sup> isotherm model is given in eqn. SM5.

$$q_e = \frac{RT}{b_{T_e}} \ln (a_{T_e} C_e)$$

(SM5)

Where,  $q_e$  is amount of carbofuran adsorbed per unit weight of adsorbent (mg/g).  $a_{T_e}$  and  $b_{T_e}$  are the Temkin constants related to heat of sorption (KJ/mol).  $C_e$  is the equilibrium carbofuran concentration in mg/L.  $R$  is universal gas constant and  $T$  is absolute temperature.

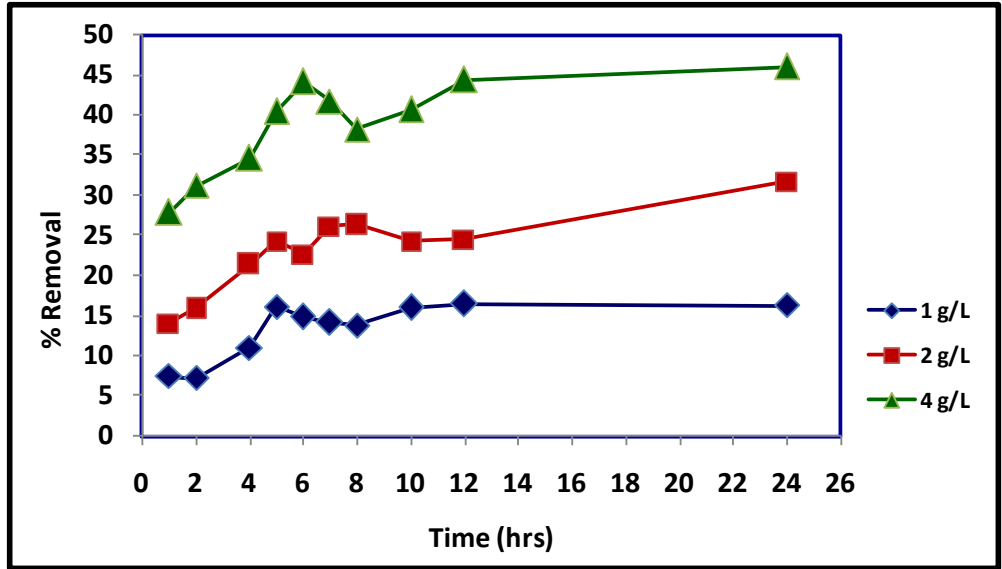

Figure SM1. Effect of different adsorbent dosages on carbofuran adsorption [pH 6.0; Carbofuran concentration= 10 mg/L; particle size=30-50 B.S.S mesh, at 25°C]

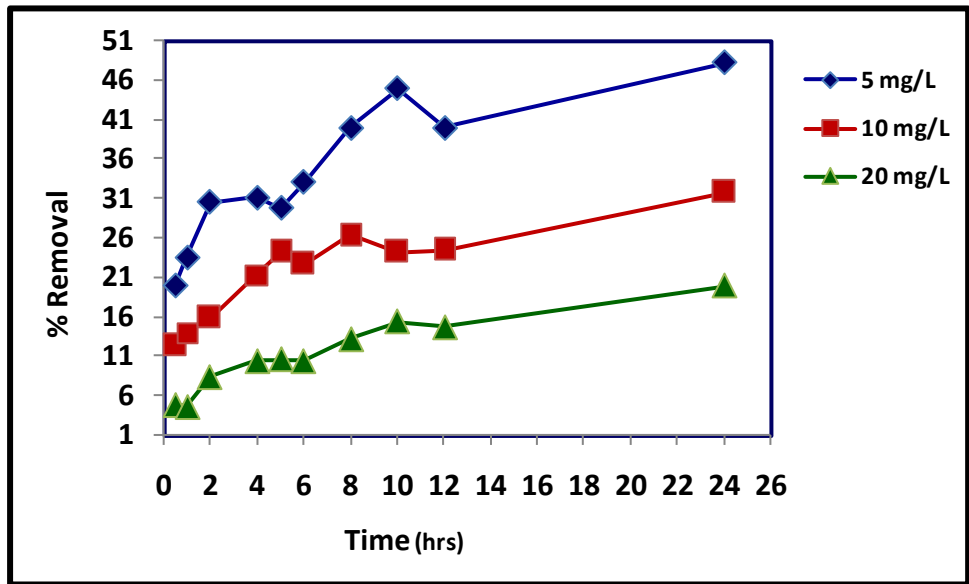

Figure SM2. Effect of different carbofuran concentration on adsorption [pH 6.0; adsorbent (SB500) dose= 2 g/L; particle size=30-50 B.S.S mesh, at 25°C]

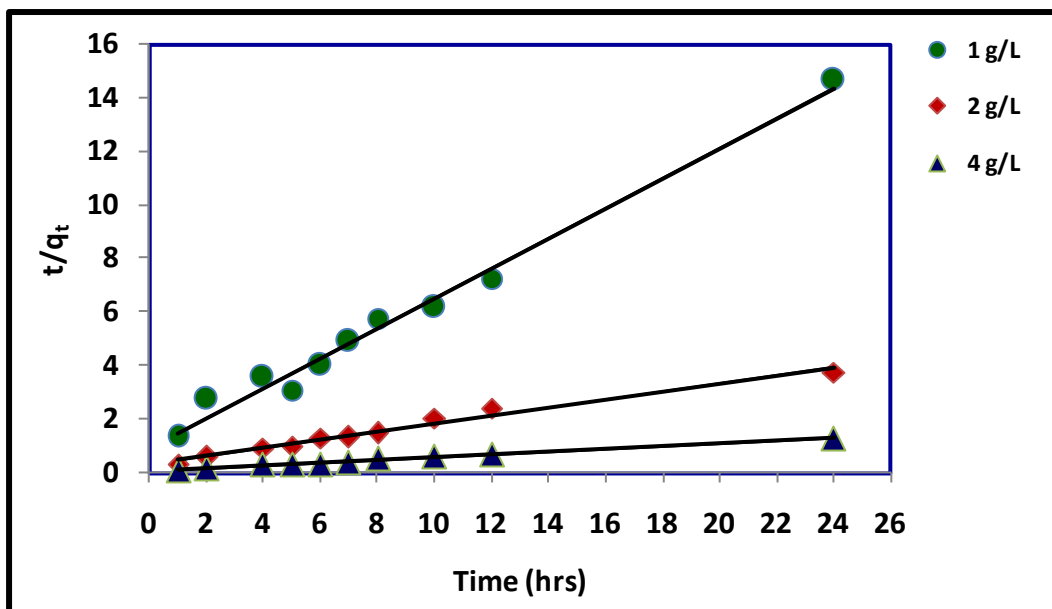

Figure SM3. Pseudo-second order kinetic plots for effect of different adsorbent (SB500) dosages on carbofuran adsorption [pH 6.0; Carbofuran concentration= 10 mg/L; particle size=30-50 B.S.S mesh, at 25°C]

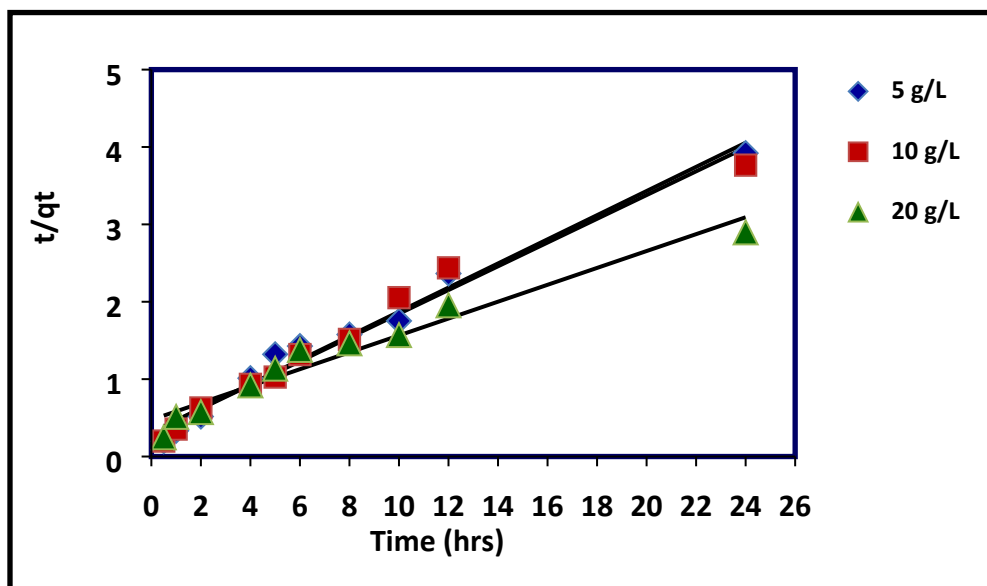

Figure SM4. Pseudo-second order kinetic plot for effect of different carbofuran concentration on adsorption by SB500 [pH 6.0; adsorbent (SB500) dose= 2 g/L; particle size=30-50 B.S.S mesh, at 25°C]

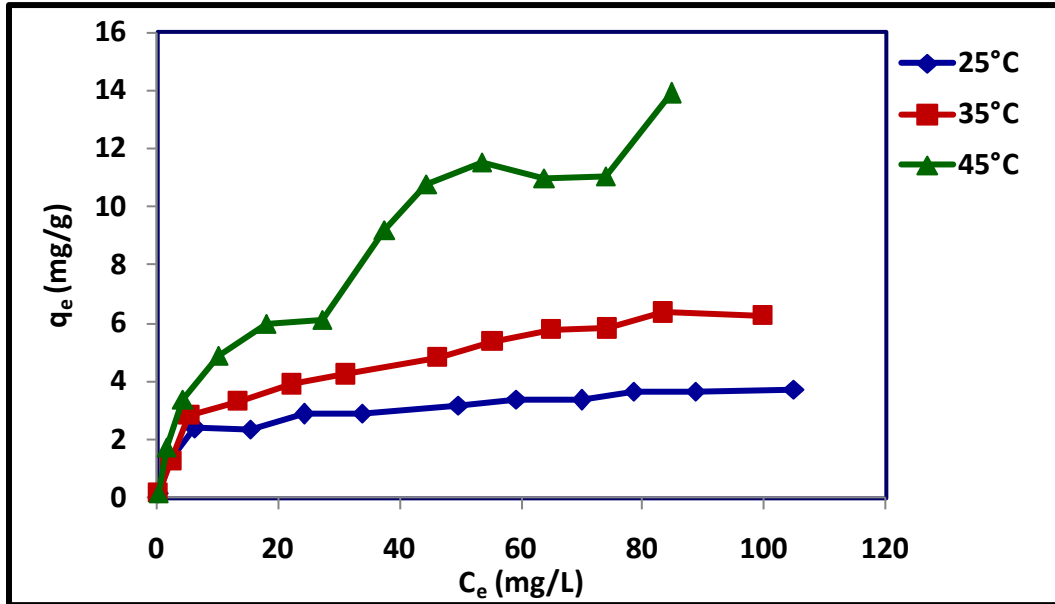

Figure SM5: Adsorption isotherms of carbofuran by SB500 at different temperatures [pH 6.0; adsorbent (SB500) dose=2g/L; carbofuran concentration= 1-100 mg/L; particle size=30-50 B.S.S mesh].

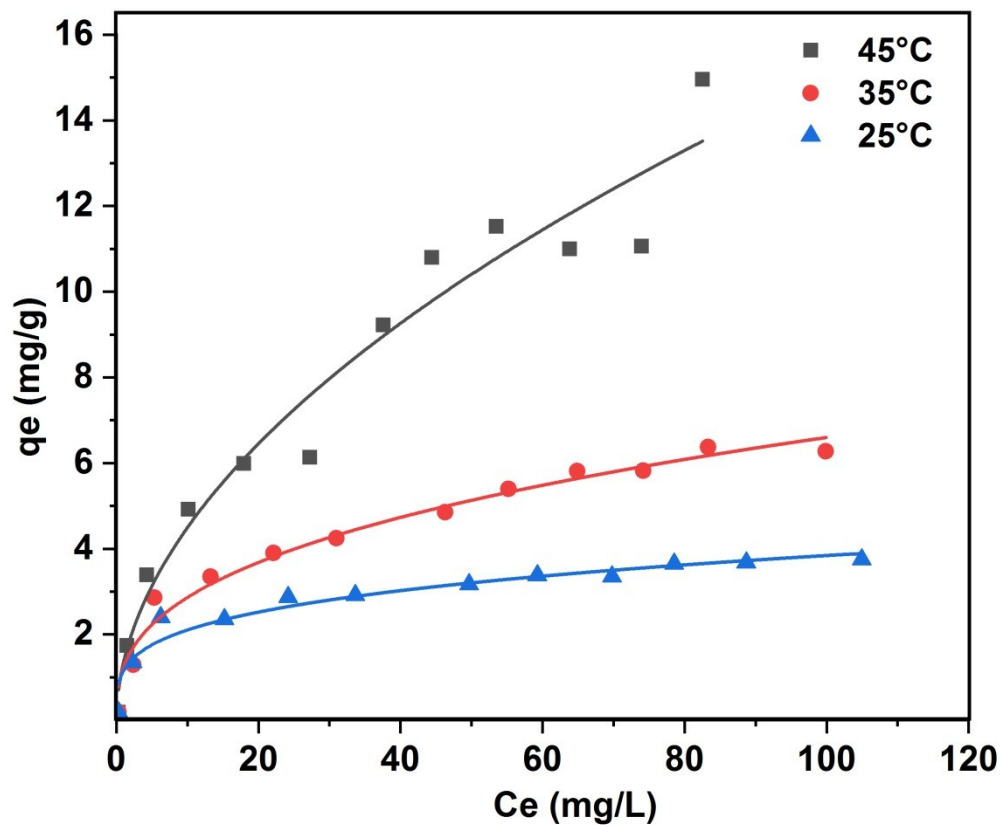

Figure SM6: Freundlich adsorption isotherms of carbofuran by SB500 at different temperatures [pH 6.0; adsorbent (SB500) dose = 2g/L; carbofuran concentration= 1-100 mg/L; particle size of 30-50 B.S.S mesh]. Colored solid lines represent the data fitted by the Freundlich isotherm model

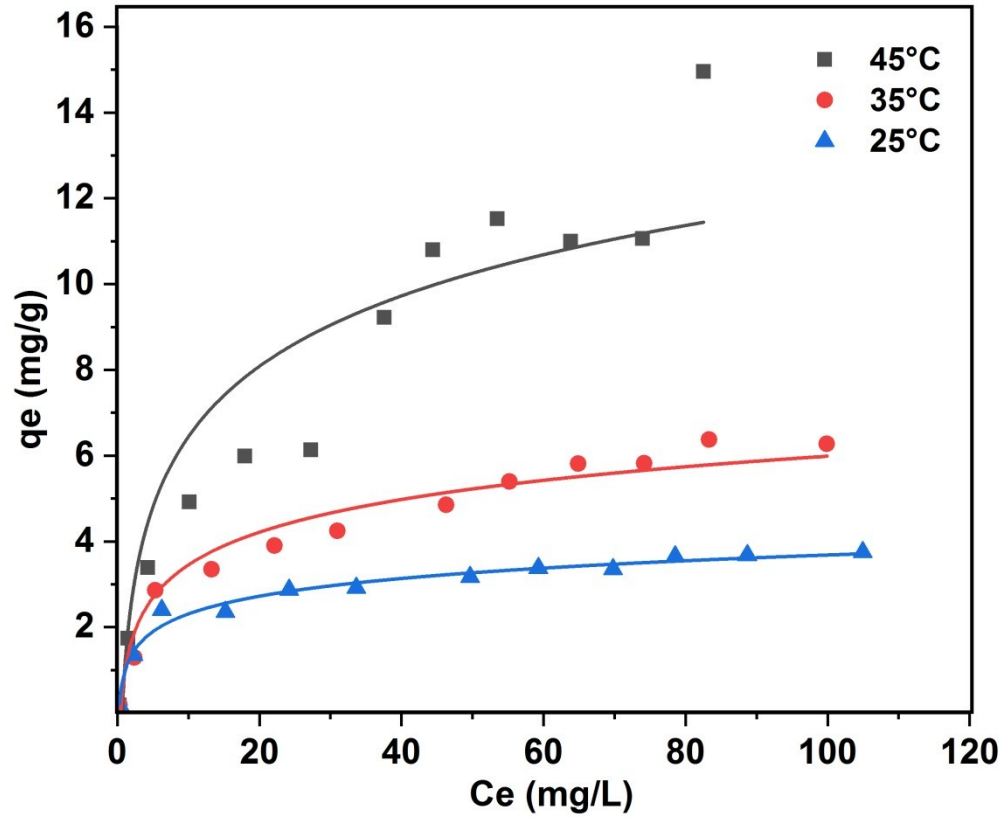

Figure SM7: Temkin adsorption isotherms of carbofuran by SB500 at different temperatures [pH 6.0; adsorbent (SB500) dose = 2g/L; carbofuran concentration= 1-100 mg/L; particle size of 30-50 B.S.S mesh]. Colored solid lines represent the data fitted by the Temkin isotherm model



**Table SM1. Pseudo first-order and pseudo-second order rate constants and comparative evaluation of  $q_e$  as calculated experimentally and by using pseudo first and pseudo second order rate equations at different SB500 dose.**

| Dose (g/L) | First order rate constant, $k_1$ ( $h^{-1}$ ) | $R^2$ | Second order rate constant, $k_2$ ( $g\ mg^{-1}\ h^{-1}$ ) | $R^2$ | $q_e$ experimental (mg/g) | $q_e$ , calculated using first-order kinetic model (mg/g) | $q_e$ , calculated using second-order kinetic model (mg/g) |
|------------|-----------------------------------------------|-------|------------------------------------------------------------|-------|---------------------------|-----------------------------------------------------------|------------------------------------------------------------|
| 1          | 0.362                                         | 0.558 | 0.333                                                      | 0.986 | 1.638                     | 1.396                                                     | 1.786                                                      |
| 2          | 0.099                                         | 0.683 | 0.064                                                      | 0.978 | 6.373                     | 3.349                                                     | 6.666                                                      |
| 4          | 0.195                                         | 0.663 | 0.584                                                      | 0.994 | 18.455                    | 8.109                                                     | 19.120                                                     |

**Table SM2. Pseudo-first order and pseudo-second order rate constants and comparative evaluation of  $q_e$  as calculated experimentally and by using pseudo first and pseudo second-order rate equations at different carbofuran concentrations.**

| Conc. (mg/L) | First order rate constant, $k_1$ ( $h^{-1}$ ) | $R^2$  | Second order rate constant, $k_2$ ( $g\ mg^{-1}\ h^{-1}$ ) | $R^2$ | $q_e$ experimental (mg/g) | $q_e$ , calculated using first-order kinetic model (mg/g) | $q_e$ , calculated using second-order kinetic model (mg/g) |
|--------------|-----------------------------------------------|--------|------------------------------------------------------------|-------|---------------------------|-----------------------------------------------------------|------------------------------------------------------------|
| 5            | 0.1027                                        | 0.9381 | 0.0781                                                     | 0.979 | 6.121                     | 6.449                                                     | 6.410                                                      |
| 10           | 0.0958                                        | 0.727  | 0.0756                                                     | 0.977 | 6.373                     | 3.408                                                     | 6.518                                                      |
| 20           | 0.1443                                        | 0.740  | 0.0251                                                     | 0.953 | 8.285                     | 3.677                                                     | 9.165                                                      |

1. S. K. Lagergren, *Sven. Vetenskapsakad. Handlingar*, 1898, **24**, 1-39.
2. Y.-S. Ho and G. McKay, *Process biochemistry*, 1999, **34**, 451-465.
3. H. Freundlich, *Zeitschrift für physikalische Chemie*, 1907, **57**, 385-470.
4. I. Langmuir, *Journal of the American Chemical society*, 1918, **40**, 1361-1403.
5. M. Tempkin and V. Pyzhev, *Acta Phys. Chim. USSR*, 1940, **12**, 327.
6. A. Sarswat and D. Mohan, *RSC Advances*, 2016, **6**, 85390-85410.
